## Prognostic value of reduced heart rate reserve during exercise stress-echocardiography in hypertrophic cardiomyopathy

Q. Ciampi<sup>1</sup>, I. Olivotto<sup>2</sup>, M.A. D'Alfonso<sup>2</sup>, L. Tasseti<sup>2</sup>, A. Milazzo<sup>2</sup>, J. Peteiro<sup>3</sup>, L. Monserrat<sup>3</sup>, A. Palinkas<sup>4</sup>, E. Palinkas<sup>5</sup>, M. Tesic<sup>6</sup>, A. Djordjevic-Dikic<sup>6</sup>, M.A. Losi<sup>7</sup>, G. Canciello<sup>7</sup>, F. Re<sup>8</sup>, E. Picano<sup>9</sup>

<sup>1</sup>Fatebenefratelli Hospital, Division of Cardiology, Benevento, Italy; <sup>2</sup>Careggi University Hospital, Cardiology, Florence, Italy; <sup>3</sup>University Hospital A Coruna, Cardiology, A Coruna, Spain; <sup>4</sup>Elisabeth Hospital of Csongrad, Internal Medicine, Hodmezovasarhely, Hungary; <sup>5</sup>University of Szeged, Internal Medicine, Szeged, Hungary; <sup>6</sup>Clinical center of Serbia, Cardiology, Belgrade, Serbia; <sup>7</sup>Federico II University of Naples, Cardiology, Naples, Italy; <sup>8</sup>San Camillo Forlanini Hospital, Cardiology, Rome, Italy; <sup>9</sup>National Council of Research, Cardiology, Pisa, Italy

On behalf of Stress Echo 2020 study group of the Italian Society of Cardiovascular Echography and Cardiovascular Imaging

**Funding Acknowledgement:** Type of funding source: None

**Background:** Heart rate reserve (HRR) during exercise evaluates chronotropic incompetence and is a prognostically important marker of cardiac autonomic dysfunction, additive to regional wall motion abnormalities (RWMA) in patients with coronary artery disease.

**Objectives:** To assess determinants and prognostic value of HRR in patients with hypertrophic cardiomyopathy (HCM).

**Methods:** From 1998 to 2019, we enrolled 774 HCM patients (age = 48.8±15.9 years, 410 men) with exercise stress echocardiography (ESE) in 10 certified centres of the international stress echo network. During ESE we assessed: left ventricular outflow tract obstruction (LVOTO, significant when >50 mmHg); RWMA; HRR (peak/ rest heart rate), 344 in beta-blockers therapy (44.4%). Patients were followed for a median 49 months (IQ range, 25–78 months). The study end-point was all-cause mortality.

**Results:** During ESE, we observed stress-induced RWMA in 42 (5.4%) and LVOTO in 248 (33%); HRR was 1.92±0.41. There were no differ-

ence in patients with normal and abnormal HRR with and without beta-blockers therapy (147, 41.1% vs 211, 58.9%, p=0.079). During follow-up, 43 deaths occurred. Beta blockers therapy in univariate analysis did not have prognostic role (HR 1.105, 95% CI 0.602–2.028, p=0.768). The lowest HRR quartile (≤1.62) had a 10-fold higher 6-year death rate (10.9%) than the highest quartile (>2.16, 1.04%): see figure. At multivariable analysis, lowest HRR quartile (HR 2.074, 95% CI 1.082–6.773, p=0.034), age (HR 1.045, 95% CI 1.014–1.077, p=0.004), maximal wall thickness (HR 1.137, 95% CI 1.054–1.226, p=0.001), stress-induced RWMA s(HR 4.289, 95% CI 1.733–10.615, p=0.002) and ≥ moderate mitral regurgitation at rest (HR 3.127, 95% CI 1.507–6.488, p=0.002) predicted death.

**Conclusions:** A blunted HRR during ESE predicts adverse outcome independent of inducible RWMA in HCM patients. Autonomic dysfunction deserves consideration as a potential therapeutic target in this disease.

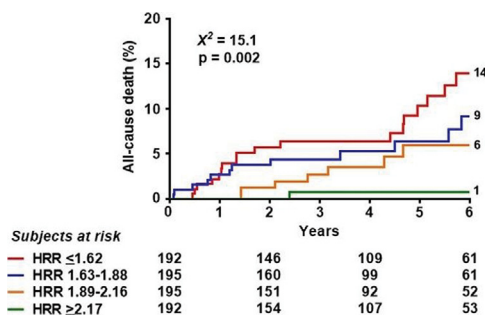

Figure 1
